# Supplementary material
Source: PubMed Central journal article supplement (PMC6859645)
Supplement: NIHMS1002335-supplement-1.pdf [file NIHMS1002335-supplement-1.pdf]

## Supplementary Online Content

DeAngelis H, Scarpino SV, Fitzpatrick MC, Galvani AP, Althouse BM.  
Epidemiological and economic effects of priming with the whole-cell *Bordetella pertussis* vaccine. *JAMA Pediatr*. Published online March 28, 2016.  
doi:10.1001/jamapediatrics.2016.0047.

### eAppendix. Methods

**eFigure 1.** Potential Vaccine Scare

**eFigure 2.** Breakdown of Symptomatically Infected Individuals According to CDC Data Compared With the  $\sigma = 0.5$  Model Output After 50 Years in the First Epoch

**eFigure 3.** Breakdown of Asymptomatically Infected Individuals According to Model Output Where  $\sigma = 0.50$  After 50 Years in the Second Epoch

**eFigure 4.** Breakdown of Symptomatically Infected Individuals According to CDC Data Compared With the  $\sigma = 0.25$  Model Output After 50 Years in the First Epoch

**eFigure 5.** Estimates for the Rates of Symptomatic Infection, Hospitalizations, and Infant Deaths per 100,000 Total Population During the First 10 Years in the Second Epoch When  $\sigma = 0.25$

**eFigure 6.** Breakdown of Symptomatically Infected Individuals According to CDC Data Compared With the  $\sigma = 0.75$  Model Output After 50 Years in the First Epoch

**eFigure 7.** Estimates for the Rates of Symptomatic Infection, Hospitalizations, and Infant Deaths per 100,000 Total Population During the First 10 Years in the Second Epoch When  $\sigma = 0.75$

**eFigure 8:** Average Rate of Symptomatic Infection Over 10 Years in the Second Epoch When  $\sigma = 0.5$

**eTable 1.** Parameters Used in the Base Case

**eTable 2.** Rates of Adverse Events to *B pertussis*

**eTable 3.** Rates of Adverse Events to *B pertussis* Vaccines

**eTable 4.** Base Case Cost Estimates for Pertussis and Vaccine-Related Side Effects

© 2016 American Medical Association. All rights reserved.

**eTable 5.** QALY Disutility Estimates

**eTable 6.** Transmission Model Estimates of Incidence of *B pertussis* in 10 years in the Second Epoch

**eTable 7.** Transmission Model Estimates Incidence of *B pertussis* Complications in 10 Years in the Second Epoch

**eTable 8.** Transmission Model Estimates Incidence of Pertussis Vaccine Side Effects in 10 Years in the Second Epoch

**eReferences**

This supplementary material has been provided by the authors to give readers additional information about their work.

## eAppendix. Methods

### Model Description

We formulate an age-structured Susceptible, Infected, Removed (SIR) model for the transmission of *B. pertussis*. In the model, susceptibles are born at rate  $\mu$ , where 90% are vaccinated with either aP or wP, depending on the strategy being tested (see main text for description of strategies). To allow for age-specific contact rates, individuals mix according to a contact matrix,  $C$  [1]. Unvaccinated individuals are infected at rate  $\beta$  and become symptomatic with probability  $\sigma$ . Symptomatically infected individuals are hospitalized at rate  $\delta$ , and recover at rate  $\delta r$ , which depends on age (0-5 years, 5-18 years, more than 18 years). Hospitalized infants die at rate  $\rho$ . Both asymptotically and symptomatically infected individuals recover at rate  $\gamma$ . Individuals vaccinated with either aP or wP incur a benefit from vaccination in the form of a reduced  $\beta$ , which is determined by dividing  $\beta$  by the vaccine efficacy values ( $ve1 - 9$ ). Those vaccinated solely with aP enter a class where they can become asymptotically infected at rate  $\beta$ , the same rate at which susceptibles become symptomatically infected. On the other hand, individuals vaccinated with the combined strategy can only become asymptotically infected at rate  $\beta/(ve1-9)$ . In the removed class, individuals with natural immunity are subject to waning immunity at rate  $\omega a$  for adolescents and  $\omega b$  for adults. Finally, adults age out of the model at rate  $\nu$ , which is equal to  $\mu$ .

In the model, the only difference between aP and wP vaccines is that aP allows for asymptomatic infection and wP reduces it. Both vaccines have the same coverage rates, both have the same efficacy and the same rate of waning vaccine induced immunity.

### Model Parameterization

We used a mixture of literature values and model fitting to estimate the parameters. Pertussis case counts were obtained from the Centers for Disease Control and Prevention *B. pertussis* surveillance reports for 2012 [2]. All parameters and references are listed in eTable 1. Individuals infected with *B. pertussis* are typically contagious for the first 2 weeks of infection followed by 4-6 weeks of characteristic paroxysmal cough [3, 4], thus we set the duration of infectiousness,  $\gamma$ , to two weeks. The hospitalization rate for infants and children 0-5 years old ( $\delta 1$ ) is 60%; for adolescents, 5-18 years old ( $\delta 2$ ) is 0.8%; and for adults ( $\delta 3$ ) is 3% [5, 6]. The length of hospital stay,  $\delta r 1$ , for infants and children is one week, for adolescents,  $\delta r 2$ , four days, and for adults,  $\delta r 3$ , two days [5, 6]. Finally, the infant death rate,  $\rho$ , is 16/100,000. The contact matrix,  $C$ , by which individuals in our model interact is based on published mixing patterns of several European countries [1]. The force of infection,  $\beta$ , and the probability of symptomatic infection,  $\sigma$ , are unknown but essential model parameters; thus we conducted a thorough sensitivity analysis for  $\beta$  and  $\sigma$ . In the base case  $\beta$  is set to  $6.5 \times 10^{-6}$  and  $\sigma$  is set to 50%, indicating that half of infected individuals will become symptomatically infected, and the other half will become asymptotically infected. The birth rate,  $\mu$ , death rate,  $\nu$  are set equal to 1/75 years to keep population sizes constant. The total population size,  $NN$ , was varied to account for transient, or chaotic effects from 525,350 to 648,775.

There is evidence that immunity to pertussis from vaccination and natural infection wanes over time [7, 8]. However, since the rates at which these types of immunity wane are difficult to determine from epidemiological data [5], our model's estimates for waning natural immunity,  $\omega a$  for adults and  $\omega b$  for adolescents, were chosen by hand to fit the data [7]. Interestingly, the values fit were near 0, indicating that the duration of immunity is quite long: for adolescents,  $\omega a$  is 1/5 years, and for adults,  $\omega b$  is 1/50 years. In this model, we manifest these waning rates in the form of a weakening vaccine efficacy. The first vaccine, for both the aP and wP strategies, gives a vaccine efficacy of  $\beta/ve1$  where  $ve1$  equals 1.5. For each vaccine after the first, in both the aP and the wP strategies, vaccine efficacy increases by a factor of ten. For example, after the second vaccine, vaccine efficacy is  $\beta/ve2$  where  $ve2$  equals 15. After the last vaccine,  $ve7$ , which equals 15,000, vaccine efficacy begins to wane. This is accomplished by decreasing  $ve8$  and  $ve9$  by a factor of ten for the adolescent age group and again for the adult age group. These values were chosen to match the proportion infected in the four age classes reported by the CDC [2] (Figure 1).

### **Sensitivity Analysis: Potential vaccine scare**

The potential for a drop in wP vaccine coverage due to an increase in wP-related side-effects is not negligible. Thus, we ran the model with varying levels of wP coverage after the switch. We find reductions in symptomatic cases in all groups besides children 1-6 years old (Figure 3). This is due to a large decrease in the numbers of asymptotically infected individuals.

### **Sensitivity Analysis: Changing the Probability of Symptomatic Infection, $\sigma$**

Since the Probability of Symptomatic Infection,  $\sigma$ , is unknown, in the base case, we set  $\sigma$  to the most agnostic value possible, 0.5. In the sensitivity analysis, though, we verified that the model's conclusions were consistent with other values of  $\sigma$ . We tested  $\sigma$  at values of 0.25 and 0.75, the results are displayed in Figures 6-7. In both cases each of the other parameters were held constant, and the model was run with a single value of  $\sigma$  over a range of population values. The data was analyzed in the same manner as the base case. For both values of  $\sigma$  the conclusions held. Namely, there were significant decreases in pertussis incidence, hospitalizations, and infant deaths due to pertussis.

### **Sensitivity Analysis: Changing the Force of Transmission, $\beta$**

Next, we tested the model's sensitivity to the force of transmission,  $\beta$ . To do this we picked a single base case with initial population 580,650 and varied  $\beta$  by  $0.1 \times 10^{-6}$  from  $\beta = 5.1 \times 10^{-6}$  to  $2.0 \times 10^{-5}$ . We calculated the average rate of infection per 100,000 for each value of  $\beta$ . The results are displayed in Figure 8. For each value of  $\beta$ , there were significant decreases in rates of pertussis incidence.

### **Sensitivity Analysis: No Catch Up Campaign**

We considered a combined strategy with no catch up wP vaccine for 5 year old children and the results held. With out the catch up campaign, the combined strategy has fewer vaccine related adverse events but allowed for more asymptomatic and symptomatic infections. In this case, the model predicted an infant rate of symptomatic *B. pertussis* infection of 0.1745 per 100,000 (95% CI: 0.1228, 0.2557), which is a decrease of 91.6% (95% CI: 87.7, 94.0) compared to the acellular strategy. It predicted an average rate of symptomatic infection for all age groups of 3.265 (95% CI: 2.565, 4.139), which is a percent decrease of 82.7% (95% CI: 78.3, 86.5) compared to the acellular strategy. The combined strategy without the catch up campaign would cost \$4,442 per 100,000 (95% CI: 3,025, 5,859) and would lose 0.12 QALYs per 100,000. This is an 84.6% reduction in QALYs lost and an 90.8% (95% CI: 87.8, 93.7) reduction in costs. As with the base case, the combined strategy without the catch-up campaign provides significant health benefits as well as economic savings.

## Sensitivity Analyses

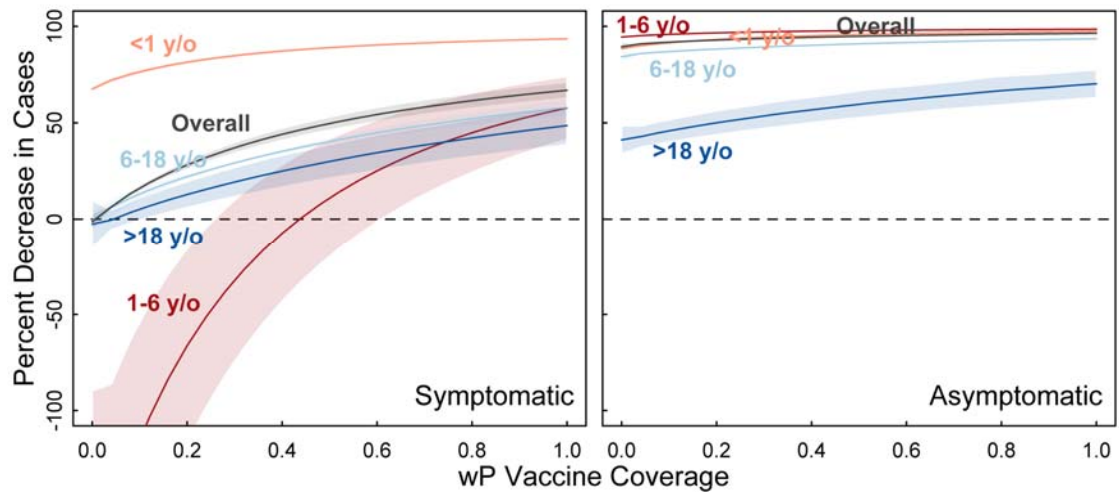

**eFigure 1.** Potential Vaccine Score. Figure shows the expected decrease in symptomatic cases by age for varying levels of wP coverage after the switch to the combined campaign. Large decreases in asymptomatic individuals lowers the overall force of infection in the population.

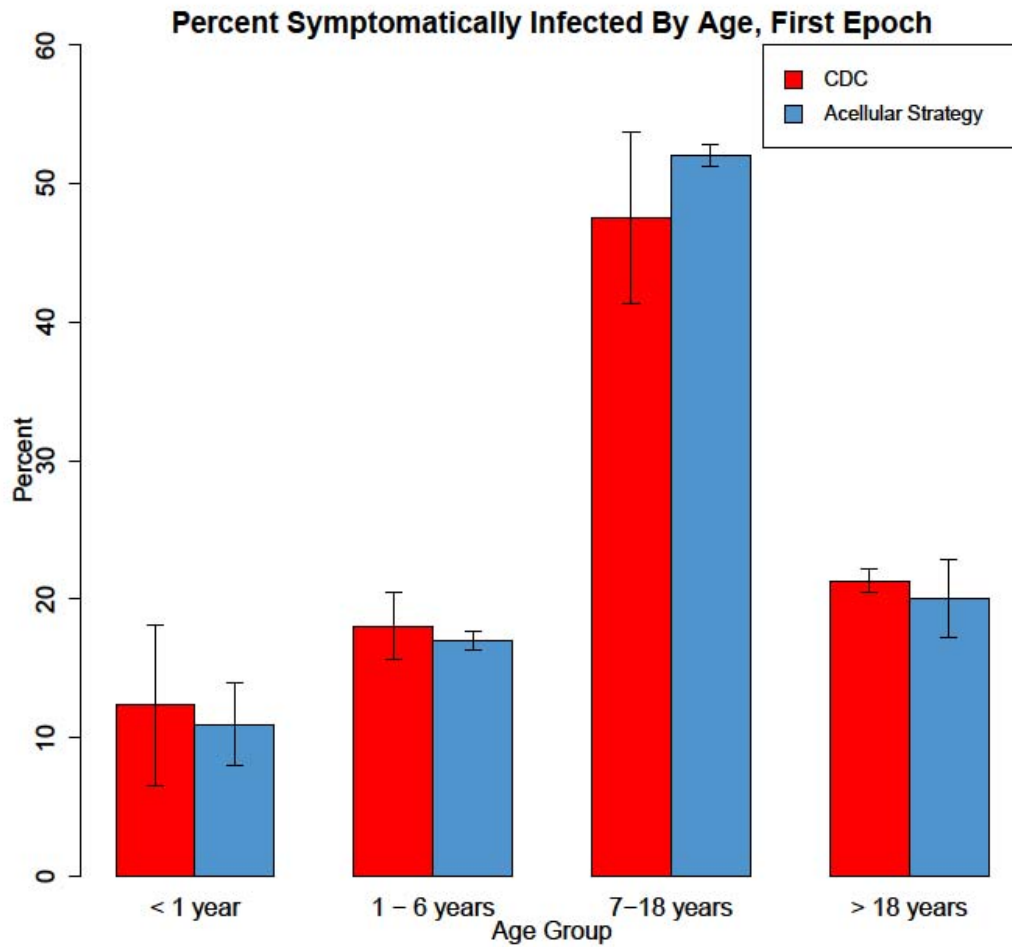

**eFigure 2.** Breakdown of Symptomatically Infected Individuals According to CDC Data Compared With the  $\sigma = 0.5$  Model Output After 50 Years in the First Epoch. Data are displayed with 95% confidence intervals.

### Percent Asymptomatically Infected By Age, Second Epoch

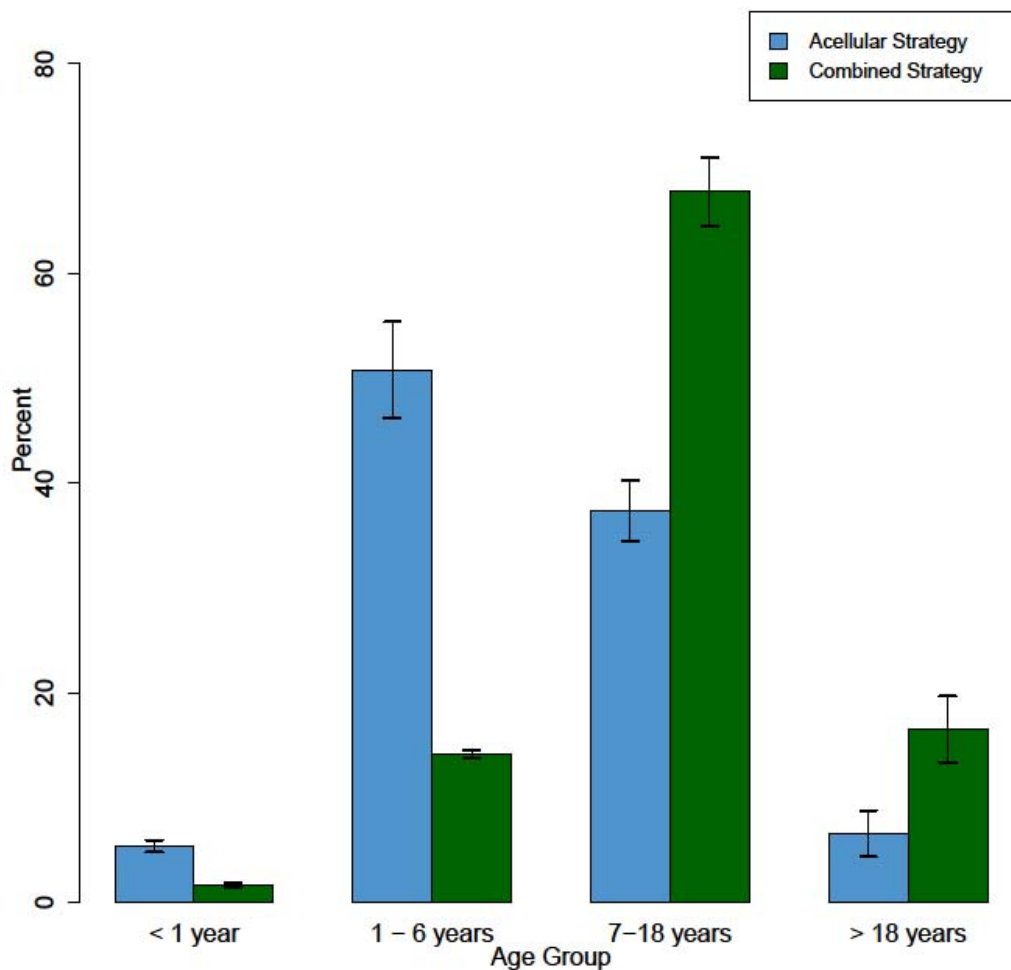

**eFigure 3.** Breakdown of Asymptomatically Infected Individuals According to Model Output Where  $\sigma = 0.50$  After 50 Years in the Second Epoch. Data are displayed with 95% confidence intervals

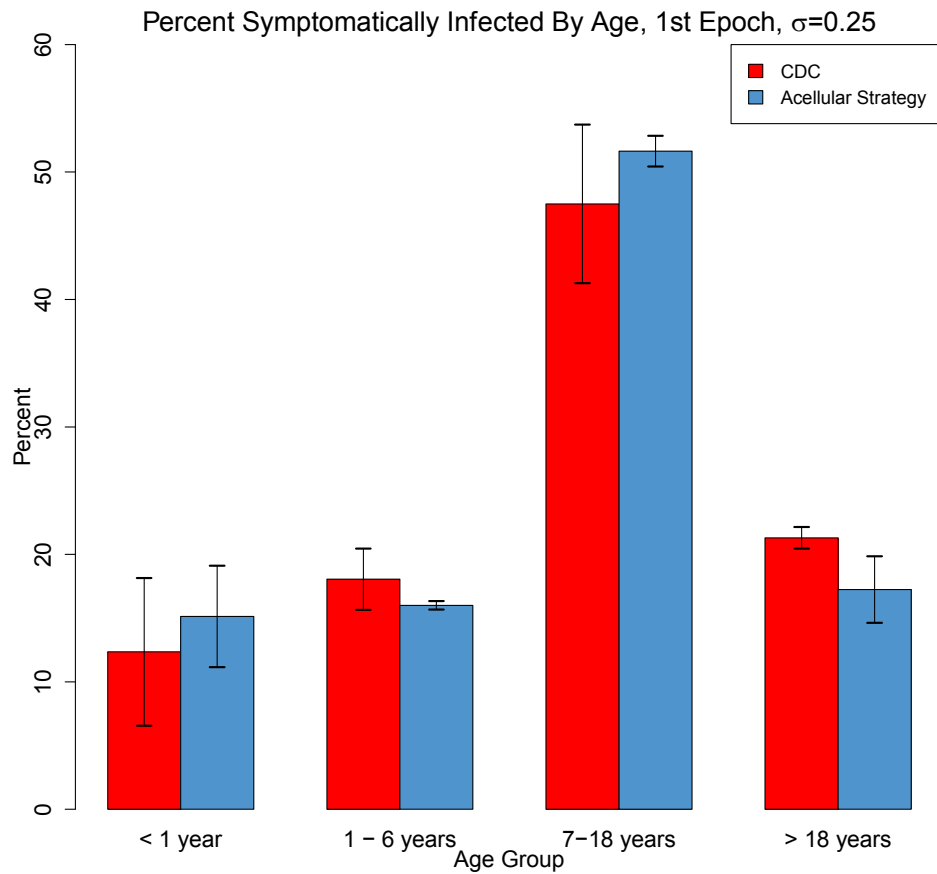

**eFigure 4.** Breakdown of Symptomatically Infected Individuals According to CDC Data Compared With the  $\sigma = 0.25$  Model Output After 50 Years in the First Epoch.



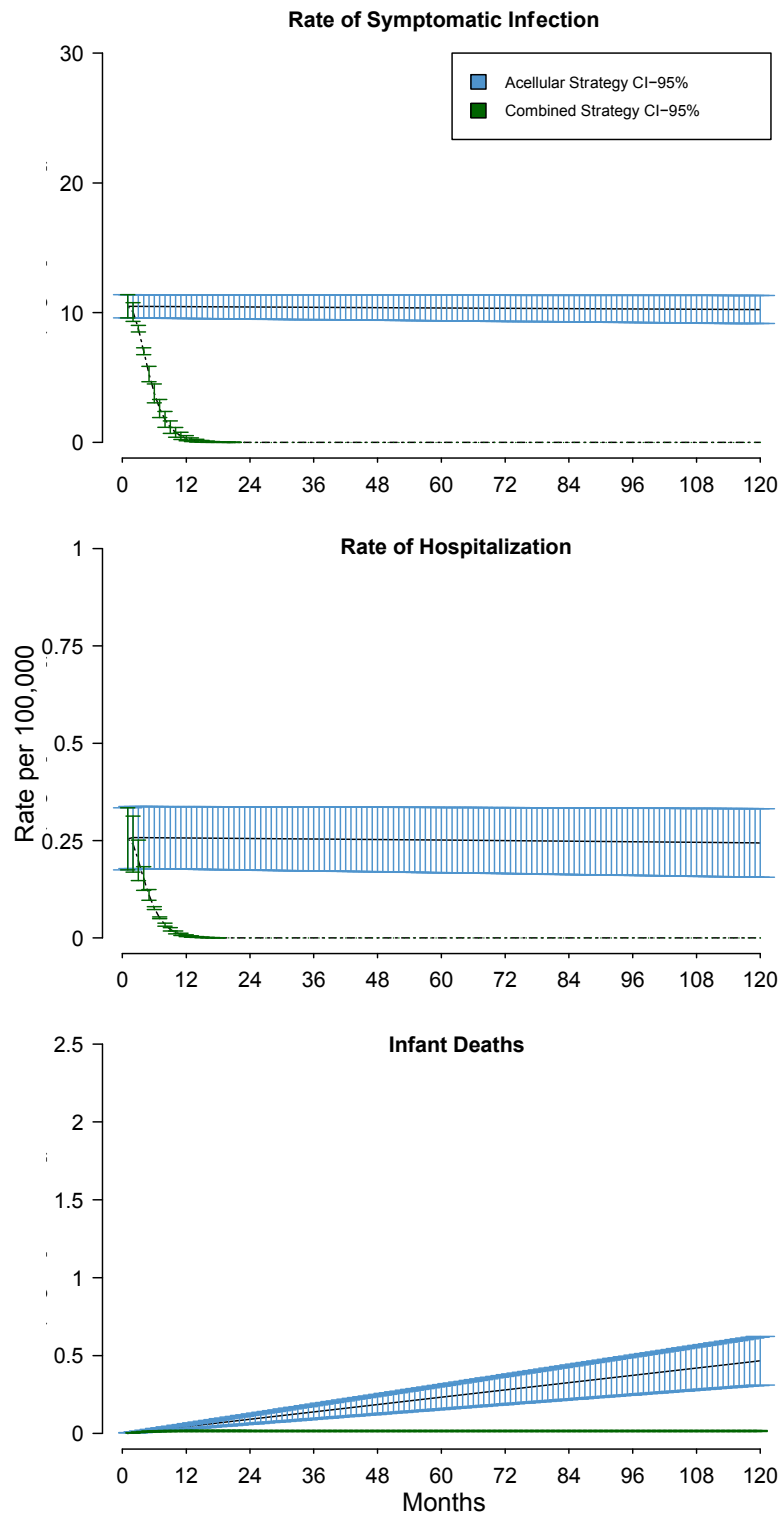

**eFigure 5.** Estimates for the Rates of Symptomatic Infection, Hospitalizations, and Infant Deaths per 100,000 Total Population During the First 10 Years in the Second Epoch When  $\sigma = 0.25$ .

© 2016 American Medical Association. All rights reserved.

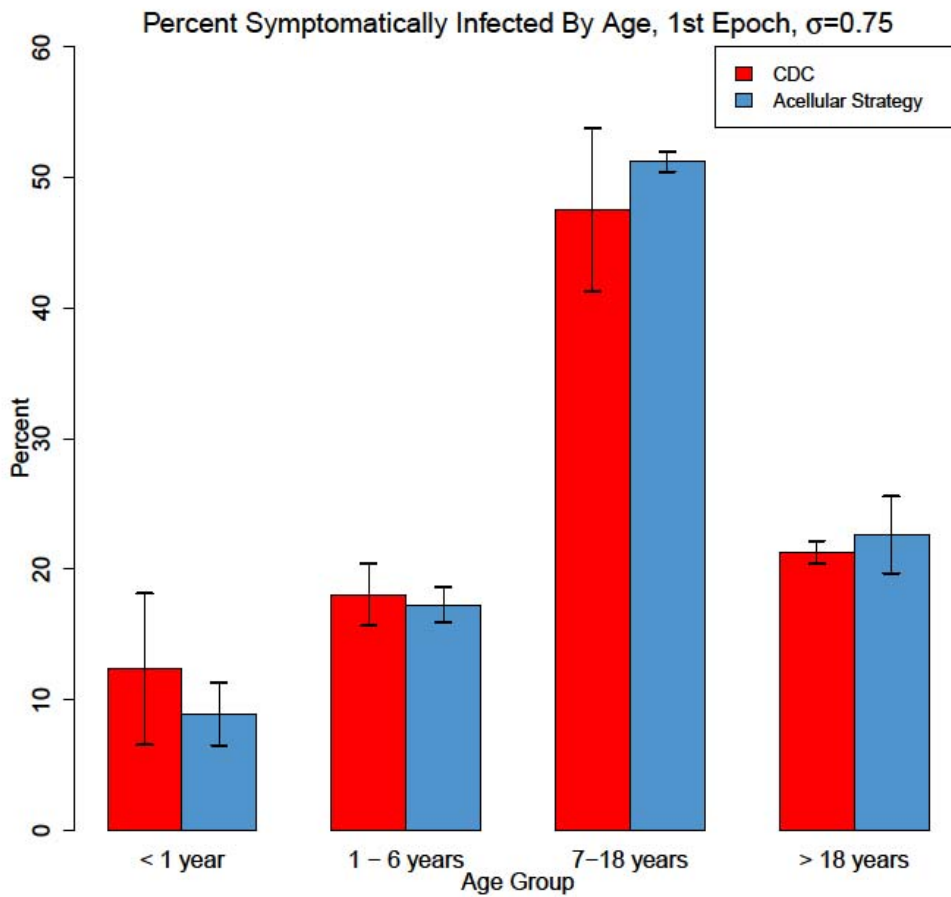

**eFigure 6.** Breakdown of Symptomatically Infected Individuals According to CDC Data Compared With the  $\sigma = 0.75$  Model Output After 50 Years in the First Epoch.

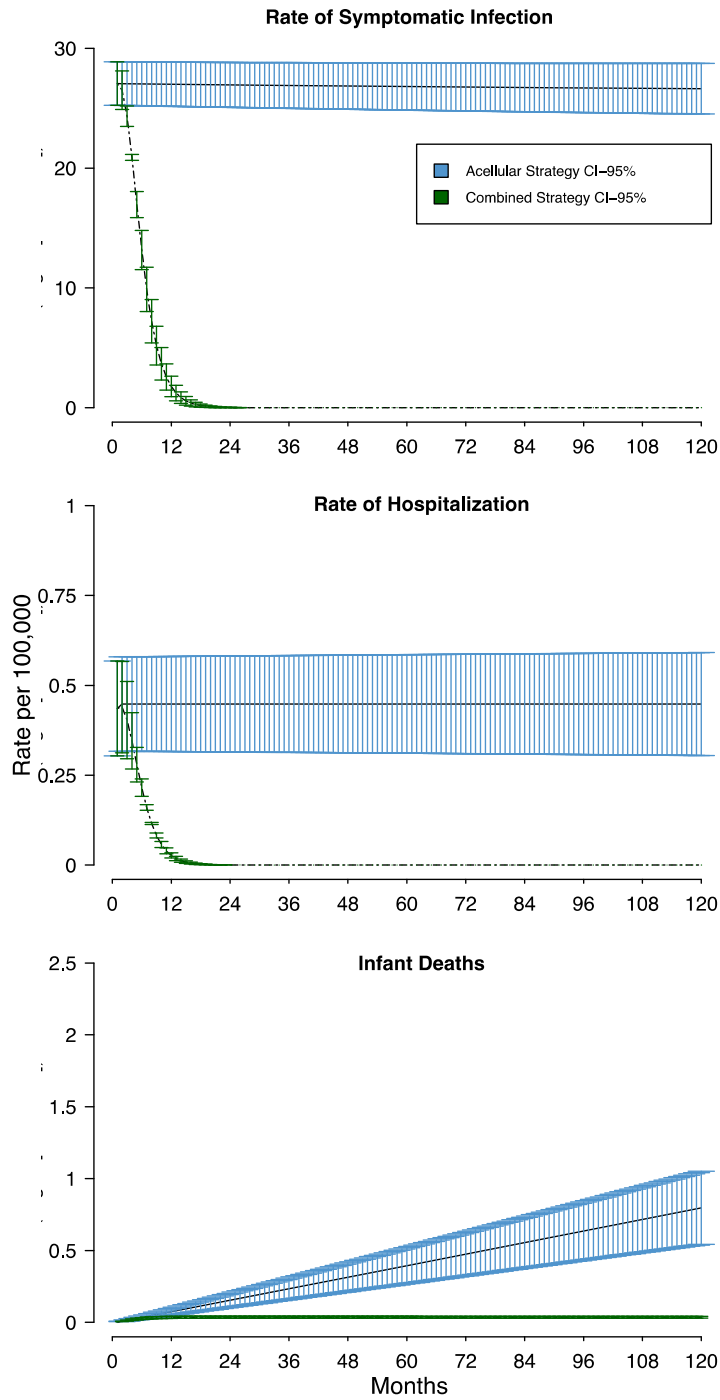

**eFigure 7.** Estimates for the Rates of Symptomatic Infection, Hospitalizations, and Infant Deaths per 100,000 Total Population During the First 10 Years in the Second Epoch When  $\sigma = 0.75$ .

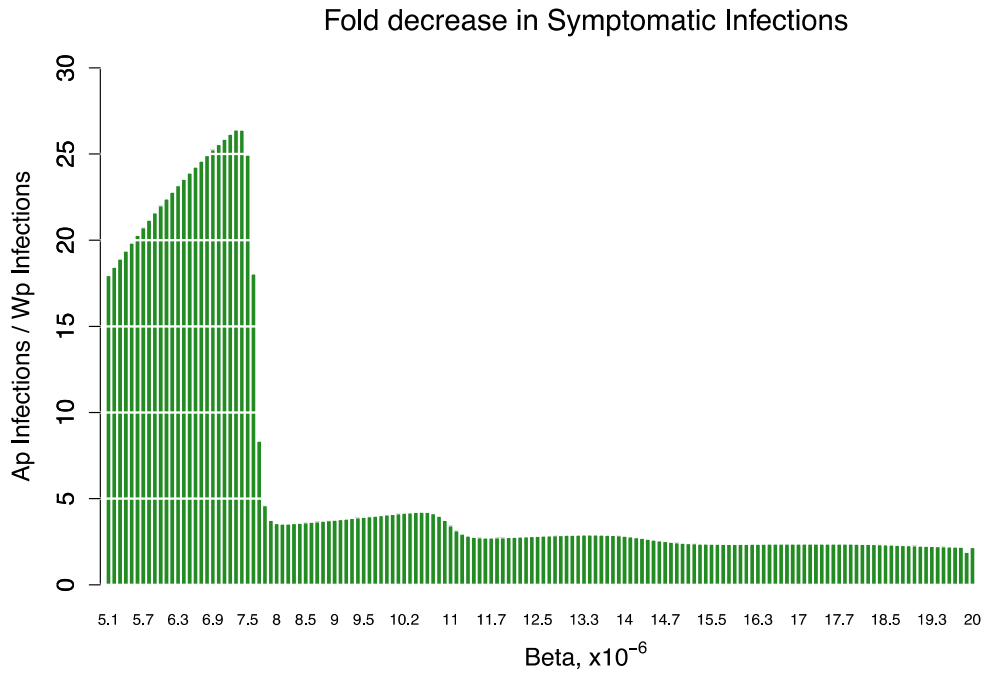

**eFigure 8.** Average Rate of Symptomatic Infection Over 10 Years in the Second Epoch When  $\sigma = 0.5$ .

| Parameters  |                                        |                      |        |
|-------------|----------------------------------------|----------------------|--------|
|             |                                        |                      | Source |
| $\beta$     | Force of infection                     | $6.5 \times 10^{-6}$ | --     |
| $\sigma$    | Probability of symptomatic infection   | 0.5                  | --     |
| $\gamma$    | Rate of recovery                       | 2 weeks              | [3]    |
| $\omega_a$  | Rate of waning natural immunity        | 1/600                | --     |
| $\omega_b$  | Rate of waning natural immunity adults | 1/6000               | --     |
| $\mu$       | Birth rate                             | 1 in 75 yrs          | --     |
| $\nu$       | Death rate                             | $\mu$                | --     |
| $\delta_1$  | Rate of hospitalization 0-5 yrs        | 60%                  | [6]    |
| $\delta_2$  | Rate of hospitalization 5-18 yrs       | 0.8%                 | [5]    |
| $\delta_3$  | Rate of hospitalization >18 years      | 3%                   | [5]    |
| $r\delta_1$ | Length of hospitalization 0-5 yrs      | 7 days               | [6]    |
| $r\delta_2$ | Length of hospitalization 5-18 yrs     | 4 days               | [9]    |
| $r\delta_3$ | Length of hospitalization >18 years    | 2 days               | [9]    |
| $\rho$      | Infant death rate                      | 16/1000 <sup>†</sup> | [5]    |
| C           | Contact matrix                         | --                   | [1]    |
| $ve_1$      | Vaccine efficacy in 2-4 mo             | 1.5                  | --     |
| $ve_2$      | Vaccine efficacy in 4-6 mo             | 15                   | --     |
| $ve_3$      | Vaccine efficacy in 6-8 mo             | 150                  | --     |
| $ve_4$      | Vaccine efficacy in 8-18mo             | 150                  | --     |
| $ve_5$      | Vaccine efficacy in 18-24 mo           | 1,500                | --     |
| $ve_6$      | Vaccine efficacy in 2-4yrs             | 1,500                | --     |
| $ve_7$      | Vaccine efficacy in 4-5yrs             | 15,000               | --     |
| $ve_8$      | Vaccine efficacy in 5-18yrs            | 1,500                | --     |
| $ve_9$      | Vaccine efficacy in >18 yrs            | 150                  | --     |
| NN          | Initial population                     | 525,350 - 648,775    | --     |
| $\eta$      | Demographic Adjustment                 | 4                    | --     |

**eTable 1.** Parameters Used in the Base Case. † of hospitalized infants.

**eTable 2.** Rates of Adverse Events to *B pertussis*. All rates per hospitalized individuals.

|                       | <b>Infants and Children 0-6yrs</b> | <b>Adolescents and Adults</b> | <b>Source</b> |
|-----------------------|------------------------------------|-------------------------------|---------------|
| <b>Pneumonia</b>      | 0.23                               | 0.02                          | [5]           |
| <b>Seizures</b>       | $1.6 \times 10^{-2}$               | --                            | [5]           |
| <b>Encephalopathy</b> | $4.0 \times 10^{-3}$               | --                            | [5]           |

**eTable 3. Rates of Adverse Events to *B pertussis* Vaccines**

**All rates per vaccinated Individuals**

|                                        | <b>Rate</b> | <b>Source</b> |
|----------------------------------------|-------------|---------------|
| <b>Fever</b>                           |             |               |
| aP                                     | 1/16,000    | [10]          |
| wP                                     | 1/330       | [11]          |
| <b>Persistent, inconsolable crying</b> |             |               |
| aP                                     | 1/1,000     | [10]          |
| wP                                     | 1/100       | [11]          |
| <b>Seizures</b>                        |             |               |
| aP                                     | 0.5/100,000 | [12]          |
| wP                                     | 1.7/100,000 | [12]          |
| <b>Encephalopathy</b>                  |             |               |
| aP                                     | --          | --            |
| wP                                     | 1/170,000   | [13]          |

**eTable 4.** Base Case Cost Estimates for Pertussis and Vaccine-Related Side Effects. All costs are adjusted to 2012 U.S. Dollars.

| Cost, \$                        | Age Group    |                 |         |            | Source  |
|---------------------------------|--------------|-----------------|---------|------------|---------|
|                                 | Infants <1yr | Children 1-6yrs | 7-18yrs | Adults >18 |         |
| <b>Pertussis Complications</b>  |              |                 |         |            |         |
| Hospitalization                 | 4,269        | 2,085           | 4,876   | 7,966      | [16]    |
| In addition:                    |              |                 |         |            |         |
| Pneumonia                       | 2,300        | 2,300           | 1,500   | 1,200      | [14]    |
| Seizures                        | 4,700        | 4,700           | 3,500   | 2,400      | [14]    |
| Encephalopathy                  | 7,000        | 7,000           | 5,800   | 4,700      | [14]    |
| Death                           | 18,200       | --              | --      | --         | [15]    |
| Societal cost:                  | 8.3 million  | --              | --      | --         | [17]    |
| <b>Vaccine Side Effects</b>     |              |                 |         |            |         |
| Fever                           |              |                 |         |            |         |
| Persistent, inconsolable crying | 2,200        | 2,200           | --      | --         | [13,14] |
| Seizures                        | 9,100        | 9,100           | --      | --         | [13,14] |
| Encephalopathy                  | 16,000       | 16,000          |         |            | [13,14] |
| Societal cost:                  | 24,000       | 24,000          | --      | --         | [14]    |

Cost estimates for *B. pertussis* complications and vaccine related adverse events were taken from previously published *B. pertussis* cost-effectiveness analyses [13, 14, 15]. The value of societal cost of death was taken from US Environmental Protection Agency 2014 estimates. . All costs were adjusted to 2012 US dollars.



**eTable 5.** QALY Disutility Estimates. Disutility= 1–Utility.

|                                | Age Group    |                 |         |             | Source |
|--------------------------------|--------------|-----------------|---------|-------------|--------|
|                                | Infants <1yr | Children 1-6yrs | 7-18yrs | Adults > 18 |        |
| <b>Pertussis Complications</b> |              |                 |         |             |        |
| Pertussis infection            | 0.15         | 0.26            | 0.21    | 0.15        | [18]   |
| Hospitalization                | 0.42         | 0.37            | 0.3     | 0.19        | [18]   |
| Pneumonia                      | 0.42         | 0.37            | .33     | 0.18        | [9,19] |
| Seizures                       | 0.49         | 0.49            | --      | --          | [9]    |
| Encephalopathy                 | 0.49         | 0.49            | --      | --          | [9]    |
| Death                          | 1            | --              | --      | --          | [20]   |
| <b>Vaccine Side Effects</b>    |              |                 |         |             |        |
| Seizures                       | 0.49         | 0.49            | --      | --          | [9]    |
| Encephalopathy                 | 49           | 0.49            | --      | --          | [9]    |

**eTable 6.** Transmission Model Estimates of Incidence of *B pertussis* in 10 years in the Second Epoch. \*All rates are per 100,000 and are listed with 95% confidence intervals.

| Incidence Rates                |                                  |                                 |                             |                               |                |
|--------------------------------|----------------------------------|---------------------------------|-----------------------------|-------------------------------|----------------|
|                                | Age Group                        |                                 |                             |                               |                |
|                                | Infants <1yr                     | Children 1-6yrs                 | 7-18yrs                     | Adults >18                    | Total          |
| <b>Rate of Infection</b>       |                                  |                                 |                             |                               |                |
| aP strat.                      | 2.074                            | 3.235                           | 9.854                       | 3.758                         | 18.92          |
| 95% CI                         | [2.071, 2.077]                   | [3.233, 3.237]                  | [9.845, 9.862]              | [3.753, 3.763]                | [18.90, 18.94] |
| comb. strat.                   | 0.087                            | 0.149                           | 0.471                       | 0.178                         | 0.885          |
| 95% CI                         | [.041, .176 ]                    | [.073, .292]                    | [.226, .899]                | [.083, .344]                  | [.428, 1.701]  |
| Percent Decrease               | 96                               | 95                              | 95                          | 95                            | 95             |
| 95% CI                         | [92, 98]                         | [91, 98]                        | [91, 98]                    | [91, 98]                      | [91, 98]       |
| <b>Rate of Hospitalization</b> |                                  |                                 |                             |                               |                |
| aP strat.                      | 0.3449                           | $2.70 \times 10^{-3}$           | 0.0104                      | 0.0075                        | 0.3645         |
| 95% CI                         | [.3434, .3444]                   | [ $2.70, 2.70 \times 10^{-3}$ ] | [.0104, .0105]              | [.0071, .0075]                | [.3641, .3651] |
| comb. strat.                   | 0.0155                           | $1.286 \times 10^{-4}$          | $5.127 \times 10^{-4}$      | $2.966 \times 10^{-4}$        | 0.0164         |
| 95% CI                         | [.0071, .0299]                   | [ $1.0, 2.0 \times 10^{-4}$ ]   | [.2, $1.0 \times 10^{-3}$ ] | [ $1.0, 6.0 \times 10^{-4}$ ] | [.0076, .0311] |
| Percent Decrease               | 96                               | 95                              | 95                          | 96                            | 96             |
| 95% CI                         | [91, 97]                         | [93, 96]                        | [90, 98]                    | [92, 99]                      | [95, 99]       |
| <b>Infant Death Rate</b>       |                                  |                                 |                             |                               |                |
| aP strat.                      | $5.554 \times 10^{-3}$           | --                              | --                          | --                            | --             |
| 95% CI                         | [1.106, $1.107 \times 10^{-2}$ ] | --                              | --                          | --                            | --             |
| comb. strat.                   | $2.230 \times 10^{-4}$           | --                              | --                          | --                            | --             |
| 95% CI                         | [1.00, $5.00 \times 10^{-4}$ ]   | --                              | --                          | --                            | --             |
| Percent Decrease               | 96                               | --                              | --                          | --                            | --             |
| 95% CI                         | [92, 98]                         | --                              | --                          | --                            | --             |

**eTable 7.** Transmission Model Estimates Incidence of *B pertussis* Complications in 10 Years in the Second Epoch. \*All rates are per 100,000, are listed with 95% confidence intervals, and are based on estimates from eTable 6.

| Pertussis Complications       |                                  |                                  |                                  |                                  |                                   |
|-------------------------------|----------------------------------|----------------------------------|----------------------------------|----------------------------------|-----------------------------------|
|                               | Age Group                        |                                  |                                  |                                  |                                   |
|                               | Infants <1yr                     | Children 1-6yrs                  | 7-18yrs                          | Adults >18                       | Total                             |
| <b>Rate of Pneumonia</b>      |                                  |                                  |                                  |                                  |                                   |
| aP strat.                     | 0.0791                           | $6.235 \times 10^{-4}$           | $2.097 \times 10^{-4}$           | $1.491 \times 10^{-4}$           | 0.0801                            |
| 95% CI                        | [.0790, .0792]                   | [6.233, $6.238 \times 10^{-4}$ ] | [2.095, $2.099 \times 10^{-4}$ ] | [1.466, $1.516 \times 10^{-4}$ ] | [.07996, .0802]                   |
| comb. strat.                  | $3.555 \times 10^{-3}$           | $2.958 \times 10^{-5}$           | $1.025 \times 10^{-5}$           | $5.933 \times 10^{-6}$           | $3.601 \times 10^{-3}$            |
| 95% CI                        | [1.057, $6.052 \times 10^{-3}$ ] | [.9300, $4.987 \times 10^{-5}$ ] | [.3339, $1.717 \times 10^{-5}$ ] | [.1610, $1.026 \times 10^{-5}$ ] | [1.102, $6.099 \times 10^{-3}$ ]  |
| Percent Decrease              | 95                               | 95                               | 95                               | 96                               | 96                                |
| 95% CI                        | [92, 99]                         | [92, 99]                         | [92, 98]                         | [93, 99]                         | [92, 99]                          |
| <b>Rate of Seizures</b>       |                                  |                                  |                                  |                                  |                                   |
| aP strat.                     | $5.502 \times 10^{-3}$           | $4.338 \times 10^{-5}$           | --                               | --                               | $5.5545 \times 10^{-3}$           |
| 95% CI                        | [5.494, $5.551 \times 10^{-3}$ ] | [4.336, $4.339 \times 10^{-5}$ ] | --                               | --                               | [5.534, $5.5553 \times 10^{-3}$ ] |
| comb. strat.                  | $2.473 \times 10^{-4}$           | $2.058 \times 10^{-6}$           | --                               | --                               | $2.493 \times 10^{-4}$            |
| 95% CI                        | [.7355, $4.211 \times 10^{-4}$ ] | [.6469, $3.469 \times 10^{-6}$ ] | --                               | --                               | [.7560, $4.231 \times 10^{-4}$ ]  |
| Percent Decrease              | 95                               | 95                               | --                               | --                               | 96                                |
| 95% CI                        | [92, 99]                         | [91, 99]                         | --                               | --                               | [92, 99]                          |
| <b>Rate of Encephalopathy</b> |                                  |                                  |                                  |                                  |                                   |
| aP strat.                     | $1.376 \times 10^{-3}$           | --                               | --                               | --                               | --                                |
| 95% CI                        | [1.373, $1.378 \times 10^{-3}$ ] | --                               | --                               | --                               | --                                |
| comb. strat.                  | $6.182 \times 10^{-5}$           | --                               | --                               | --                               | --                                |
| 95% CI                        | [.1838, $1.053 \times 10^{-4}$ ] | --                               | --                               | --                               | --                                |
| Percent Decrease              | 96                               | --                               | --                               | --                               | --                                |
| 95% CI                        | [92, 99]                         | --                               | --                               | --                               | --                                |

**eTable 8.** Transmission Model Estimates Incidence of Pertussis Vaccine Side Effects in 10 Years in the Second Epoch. \*All rates are per 100,000 and are listed with 95% confidence intervals.

| <b>Vaccine Side-Effects</b>            |                                 |                                |                |                      |                                |
|----------------------------------------|---------------------------------|--------------------------------|----------------|----------------------|--------------------------------|
|                                        | <b>Age Group</b>                |                                |                |                      |                                |
|                                        | <b>Infants &lt;1yr</b>          | <b>Children 1-6yrs</b>         | <b>7-18yrs</b> | <b>Adults &gt;18</b> | <b>Total</b>                   |
| <b>Persistent, inconsolable Crying</b> |                                 |                                |                |                      |                                |
| aP strat.                              | 0.583                           | 5.051                          | --             | --                   | 5.635                          |
| 95% CI                                 | [.583, .584]                    | [5.047, 5.056]                 | --             | --                   | [5.630, 5.640]                 |
| comb. strat.                           | 1.602                           | 39.68                          | --             | --                   | 41.28                          |
| 95% CI                                 | [1.562, 1.640]                  | [35.97, 43.39]                 | --             | --                   | [37.58, 44.99]                 |
| Percent Increase                       | 175                             | 686                            | --             | --                   | 632                            |
| 95% CI                                 | [161, 188]                      | [539, 833]                     | --             | --                   | [370, 894]                     |
| <b>Rate of Fever</b>                   |                                 |                                |                |                      |                                |
| aP strat.                              | 0.036                           | 0.316                          | --             | --                   | 0.352                          |
| 95% CI                                 | [.036, .036]                    | [.315, .316]                   | --             | --                   | [.352, .352]                   |
| comb. strat.                           | 0.337                           | 10.28                          | --             | --                   | 10.62                          |
| 95% CI                                 | [.329, .344]                    | [9.158, 11.41]                 | --             | --                   | [9.498, 11.74]                 |
| Percent Increase                       | 811                             | 3150                           | --             | --                   | 2917                           |
| 95% CI                                 | [794, 851]                      | [2453, 3865]                   | --             | --                   | [1642, 4180]                   |
| <b>Rate of Seizures</b>                |                                 |                                |                |                      |                                |
| aP strat.                              | $2.92 \times 10^{-3}$           | $2.53 \times 10^{-2}$          | --             | --                   | $2.82 \times 10^{-2}$          |
| 95% CI                                 | [2.91, $2.92 \times 10^{-3}$ ]  | [2.52, $2.53 \times 10^{-2}$ ] | --             | --                   | [2.81, $2.82 \times 10^{-2}$ ] |
| comb. strat.                           | $4.76 \times 10^{-3}$           | $9.13 \times 10^{-2}$          | --             | --                   | $9.61 \times 10^{-2}$          |
| 95% CI                                 | [4.605, $4.92 \times 10^{-3}$ ] | [8.18, $9.76 \times 10^{-2}$ ] | --             | --                   | [8.98, $10.2 \times 10^{-2}$ ] |
| Percent Increase                       | 63                              | 261                            | --             | --                   | 240                            |
| 95% CI                                 | [53, 74]                        | [212, 311]                     | --             | --                   | [152, 333]                     |
| <b>Rate of Encephalopathy</b>          |                                 |                                |                |                      |                                |
| aP strat.                              | --                              | --                             | --             | --                   | --                             |
| comb. strat.                           | $5.78 \times 10^{-4}$           | --                             | --             | --                   | --                             |
| 95% CI                                 | [5.59, $5.87 \times 10^{-4}$ ]  | --                             | --             | --                   | --                             |

## eReferences

- [1] J. Mossong, N. Hens, M. Jit, P. Beutels, K. Auranen, R. Mikolajczyk, M. Massari, S. Salmaso, G. S. Tomba, J. Wallinga, et al., “Social contacts and mixing patterns relevant to the spread of infectious diseases,” *PLoS medicine*, vol. 5, no. 3, p. e74, 2008.
- [2] CDC, “Pertussis surveillance & reporting.”
- [3] Centers for Disease Control and Prevention, “Pertussis signs and symptoms,” May 2014.
- [4] CDC, “Clinical features of pertussis,” September 2014.
- [5] “Pertussis (whooping cough) clinical complications,” February 2014.
- [6] M. Tanaka, C. R. Vitek, F. B. Pascual, K. M. Bisgard, J. E. Tate, and T. V. Murphy, “Trends in pertussis among infants in the united states, 1980-1999,” *JAMA*, vol. 290, no. 22, pp. 2968–2975, 2003.
- [7] H. J. Wearing and P. Rohani, “Estimating the duration of pertussis immunity using epidemiological signatures,” *PLoS pathogens*, vol. 5, no. 10, p. e1000647, 2009.
- [8] A. M. Wendelboe, A. Van Rie, S. Salmaso, and J. A. Englund, “Duration of immunity against pertussis after natural infection or vaccination,” *The Pediatric infectious disease journal*, vol. 24, no. 5, pp. S58–S61, 2005.
- [9] G. M. Lee, S. Lett, S. Schauer, C. LeBaron, T. V. Murphy, D. Rusinak, T. A. Lieu, et al., “Societal costs and morbidity of pertussis in adolescents and adults,” *Clinical Infectious Diseases*, vol. 39, no. 11, pp. 1572–1580, 2004.
- [10] CDC, “Diphtheria, Tetanus, and Pertussis (DTaP) Vaccine Information Statement,” Dec 2007.
- [11] CDC, “Diphtheria, tetanus, and pertussis: Recommendations for vaccine use and other preventive measures recommendations of the immunization practices advisory committee (acip),” *MMWR*, vol. 40, no. No. RR-10, pp. 1–28, 1991.
- [12] S. Rosenthal, R. Chen, and S. Hadler, “The safety of acellular pertussis vaccine vs whole-cell pertussis vaccine: a postmarketing assessment,” *Archives of pediatrics & adolescent medicine*, vol. 150, no. 5, pp. 457–460, 1996.
- [13] J. P. Koplan, S. C. Schoenbaum, M. C. Weinstein, and D. W. Fraser, “Pertussis vaccine—an analysis of benefits, risks and costs,” *New England journal of medicine*, vol. 301, no. 17, pp. 906–911, 1979.
- [14] K. W. Purdy, J. W. Hay, M. F. Botteman, and J. I. Ward, “Evaluation of strategies for use of acellular pertussis vaccine in adolescents and adults: a cost-benefit analysis,” *Clinical infectious diseases*, vol. 39, no. 1, pp. 20–28, 2004.
- [15] Y. Ding, S. H. Yeh, C. A. M. Mink, K. M. Zangwill, N. J. Allred, and J. W. Hay, “Cost–benefit analysis of hospital based postpartum vaccination with combined tetanus toxoid, reduced diphtheria toxoid, and acellular pertussis vaccine (tdap),” *Vaccine*, vol. 31, no. 22, pp. 2558–2564, 2013.
- [16] Agency for Healthcare Research and Quality, Rockville, MD., “HCUP National Inpatient Sample (NIS). Healthcare Cost and Utilization Project (HCUP),” 2012.
- [17] EPA, August 2014.
- [18] L. J. McGarry, G. Krishnarajah, G. Hill, C. Masseria, M. Skornicki, N. Pruttivarasin, B. Arondekar, J. Roiz, S. I. Pelton, and M. C. Weinstein, “Cost-effectiveness of tdap vaccination of adults aged 65 years in the prevention of pertussis in the us: a dynamic model of disease transmission,” *PloS one*, vol. 9, no. 1, p. e72723, 2014.
- [19] G. M. Lee, T. V. Murphy, S. Lett, M. M. Cortese, K. Kretsinger, S. Schauer, and T. A. Lieu, “Cost effectiveness of pertussis vaccination in adults,” *American journal of preventive medicine*, vol. 32, no. 3, pp. 186–193, 2007.
- [20] F. Sassi, “Calculating qalys, comparing qaly and daly calculations,” *Health Policy and Planning*, vol. 21, no. 5, pp. 402–408, 2006.
